## CORRESPONDENCE

2. Pruett JK, Yodlowski EH, Introna RPS, Buggay DS, Crumrine RS: The influence of spinal anesthetics on heart rate variations. *Pharmacology (Life Sci Adv)* 10:51-55, 1991
3. Introna R, Yodlowski E, Pruett J, Montano N, Porta A, Crumrine R: Sympathovagal effects of spinal anesthesia assessed by heart rate variability analysis. *Anesth Analg* 80:315-321, 1995
4. Malliani A, Pagani M, Lombardi F, Cerutti S: Cardiovascular neural regulation in the frequency domain. *Circulation* 84:482-492, 1991

Anesthesiology  
83:224, 1995  
© 1995 American Society of Anesthesiologists, Inc.  
Lippincott-Raven Publishers

*In Reply:*—We appreciate the useful suggestion to our study expressed by Introna *et al.* Based on their study using spectral analysis of heart rate variability, which showed that both sympathetic and parasympathetic activity reduced after cardiac sympathectomy with spinal block,<sup>1</sup> we agree that vagal dominance after epidural anesthesia might not exist, although we did not evaluate sympathovagal balance after thoracic epidural blockade.<sup>2</sup> In our dysrhythmogenic experiments,<sup>2</sup> bilateral vagotomy did not affect the dysrhythmogenic threshold significantly in dogs without thoracic epidural blockade, suggesting that vagal stimulation alone induced by baroreceptor pressor response after epinephrine infusion was not enough to affect halothane-epinephrine dysrhythmias. However, vagal stimulation played a significant role in preventing the dysrhythmias in dogs with thoracic sympathetic blockade, although vagal outflow may have been reduced through the central nervous system.<sup>3</sup> These observations suggested that sympathetic activity as well as sympathovagal balance might be important in the myocardial sensitization by halothane.

**Takahiko Kamibayashi, M.D.**  
Staff Anesthesiologist  
Department of Anesthesiology  
Osaka University Medical School  
2-2 Yamada-oka, Suita City  
Osaka 565, Japan

Anesthesiology  
83:224-225, 1995  
© 1995 American Society of Anesthesiologists, Inc.  
Lippincott-Raven Publishers

## Parkinsonian Signs May Be Related to Bupivacaine Excess

*To the Editor:*—Muravchick and Smith described Parkinsonian signs in a patient after general anesthesia.<sup>1</sup> Of interest, bupivacaine was used, both for intercostal blockade as well as for wound infiltration in a total dose of 225 mg (45 ml of 0.5%). This is the maximum dose that can be used.<sup>2</sup> Indeed, Wood<sup>3</sup> considers 2 mg/kg the highest

5. Introna RPS, Montano N, Yodlowski EH, Crumrine RS, Malliani A, Pruett JK: Cardiothoracic sympathetic afferent activity is necessary to maintain heart rate variability (HRV) in humans. *FASEB J* 9:A341, 1995
6. Malliani A, Lombardi F, Pagani M, Cerutti S: Power spectral analysis of cardiovascular variability in patients at risk for sudden cardiac death. *J Cardiovasc Electrophysiol* 5:274-286, 1994

(Accepted for publication April 4, 1995.)

**Yukio Hayashi, M.D.**  
Staff Anesthesiologist  
Department of Anesthesiology  
National Cardiovascular Center  
1-5-7 Fujishiro-dai, Suita City  
Osaka 565, Japan

## References

1. Introna R, Yodlowski E, Pruett J, Montano N, Porta A, Crumrine R: Sympathovagal effects of spinal anesthesia assessed by heart rate variability analysis. *Anesth Analg* 80:315-321, 1995
2. Kamibayashi T, Hayashi Y, Mammoto T, Yamatodani A, Taenaka N, Yoshiya I: Thoracic epidural anesthesia attenuates halothane-induced myocardial sensitization to dysrhythmogenic effect of epinephrine in dogs. *ANESTHESIOLOGY* 82:129-134, 1995
3. Malliani A, Pagani M, Lombardi F, Cerutti S: Cardiovascular neural regulation in the frequency domain. *Circulation* 84:482-492, 1991

(Accepted for publication April 4, 1995.)

safe limit, which, in the reported case (80 kg), would have been 160 mg bupivacaine. The rate of injection and rapidity with which blood concentrations of bupivacaine are achieved can alter its toxicity signs. The use of epinephrine could have delayed the absorption of bupivacaine so that a toxic concentration would have been reached

## CORRESPONDENCE

only at the end of the procedure. Further conclusion of the case (due to incomplete reduction of the central nervous system toxicity of bupivacaine).<sup>2</sup> The signs noticed in this case and prolonged emergence from anesthesia related to a high blood concentration of bupivacaine that the blood bupivacaine concentration

**M. A. Y. Elias, F.R.C.P.**  
Pain Medicine and  
The University Centre  
Rehabilitation at  
6410 Fanning Suite  
Houston, Texas 77057

Anesthesiology  
83:225, 1995  
© 1995 American Society of Anesthesiologists, Inc.  
Lippincott-Raven Publishers

*In Reply:*—Elias implies that the unusual signs from anesthesia we described are a case of a manifestation of central nervous system toxicity. Relevant facts do not support this hypothesis. First, bupivacaine did not exceed the recommended dose that is understandable by the manifestations of local anesthetic toxicity. Second, after intercostal nerve block, my own extensive clinical experience and the literature<sup>1,2</sup> support the practice<sup>3,4</sup>; and (3) the even more so, it has been influenced significantly by the patient's condition because continuous monitoring and end-tidal carbon dioxide through the ventilator confirmed there was no evidence of hypoxia or hypercarbia presumed to exist by Elias.

**Stanley Muravchick, M.D.**  
Professor of Anesthesiology  
Department of Anesthesiology  
University of Texas Medical Branch

Anesthesiology  
83:225-226, 1995  
© 1995 American Society of Anesthesiologists, Inc.  
Lippincott-Raven Publishers

## Unanticipated

*To the Editor:*—A 47-yr-old woman with a history of experienced difficult intubations with multiple attempts undergoing general endotracheal anesthesia

## CORRESPONDENCE

only at the end of the procedure. Furthermore, hypercarbia at the conclusion of the case (due to incomplete reversal) would have reduced the central nervous system toxicity/convulsive threshold to bupivacaine.<sup>2</sup> The signs noticed in this case, *i.e.*, dystonic movement and prolonged emergence from anesthesia, thus might have been related to a high blood concentration of bupivacaine. It was unfortunate that the blood bupivacaine concentration was not measured.

**M. A. Y. Elias, F.R.C.A.**

Pain Medicine and Rehabilitation at Hermann  
The University Center for Pain Medicine and  
Rehabilitation at Hermann  
6410 Fannin, Suite 470  
Houston, Texas 77030

Anesthesiology  
83:225, 1995

© 1995 American Society of Anesthesiologists, Inc.  
Lippincott-Raven Publishers

*In Reply:*—Elias implies that the unusual Parkinsonian emergence from anesthesia we described in a case report<sup>1</sup> could have been simply a manifestation of central nervous system toxicity. However, the relevant facts do not support this hypothesis because (1) the total dose of bupivacaine did not exceed the recommended maximum, a recommendation that is understandably conservative; (2) the appearance of manifestations of local anesthetic toxicity several hours, rather than minutes, after intercostal nerve block is contrary both to our own extensive clinical experience and to current concepts in anesthetic practice<sup>2,3</sup>; and (3) the event we described could not have been influenced significantly by the adequacy of the patient's ventilation because continuous monitoring of neuromuscular blockade and end-tidal carbon dioxide throughout anesthesia and emergence confirmed there was no evidence of the incomplete reversal or the hypercarbia presumed to exist by Elias.

**Stanley Muravchick, M.D., Ph.D.**

Professor of Anesthesia  
Department of Anesthesia  
University of Pennsylvania Medical Center

Anesthesiology

83:225-226, 1995

© 1995 American Society of Anesthesiologists, Inc.  
Lippincott-Raven Publishers

## References

1. Muravchick S, Smith DS: Parkinsonian symptoms during emergence from general anesthesia. *ANESTHESIOLOGY* 82:305-307, 1995
2. Strichartz GR, Covino BG: Local anesthetics, Anesthesia. Edited by Miller RD. New York, Churchill Livingstone, 1986, pp 437-470
3. Wood M: Local anesthetics, Drugs and Anesthesia: Pharmacology for the Anesthesiologists. Edited by Wood M, Wood AJJ. Baltimore, Williams & Wilkins, 1983, pp 341-371

(Accepted for publication April 10, 1995.)

Hospital of the University of Pennsylvania  
3400 Spruce Street  
Philadelphia, Pennsylvania 19104-4283

## References

1. Muravchick S, Smith DS: Parkinsonian symptoms during emergence from general anesthesia. *ANESTHESIOLOGY* 82:305-307, 1995
2. Wedel DJ: Nerve blocks, Anesthesia. 4th edition. Edited by Miller RD. New York, Churchill-Livingstone, 1994, p 1559
3. Mulroy MF: Peripheral nerve blockade, Clinical Anesthesia. Edited by Barash PG, Cullen BF, Stoelting RK. Philadelphia, JB Lippincott, 1992, p 860

(Accepted for publication April 10, 1995.)

## Unanticipated Difficult Intubation in Two Family Members

*To the Editor:*—A 47-yr-old woman and her 70-yr-old mother experienced difficult intubations within 2 months of each other while undergoing general endotracheal anesthesia.

Preoperatively, the daughter's airway revealed a three-finger-breadth mouth opening with partial visualization of her uvula, three-finger-breadth thyroid-mental distance, adequate neck mobility, and
